# Supplementary material
Source: publisher figshare collection journal article supplement (https://brill.figshare.com/ndownloader/files/16731344)
Supplement: Supplementary file 1 [file 16731344]

## Review

### Mitigating *Batrachochytrium salamandrivorans* in Europe

Valarie Thomas<sup>1,\*\*\*,\*</sup>, Yu Wang<sup>1,\*\*</sup>, Pascale Van Rooij<sup>1</sup>, Elin Verbrugghe<sup>1</sup>, Vojtech Baláž<sup>2</sup>,  
Jaime Bosch<sup>3</sup>, Andrew A. Cunningham<sup>4</sup>, Matthew C. Fisher<sup>5</sup>, Trenton W.J. Garner<sup>4</sup>, Maarten J.  
Gilbert<sup>6,7</sup>, Elena Grasselli<sup>8</sup>, Thierry Kinet<sup>9</sup>, Arnaud Laudelout<sup>9</sup>, Stefan Lötters<sup>10</sup>, Adeline  
Loyau<sup>11,12</sup>, Claude Miaud<sup>13</sup>, Sebastiano Salvidio<sup>8</sup>, Dirk S. Schmeller<sup>11</sup>, Benedikt R. Schmidt<sup>14,15</sup>,  
Annemarieke Spitzen-van der Sluijs<sup>6</sup>, Sebastian Steinfartz<sup>16</sup>, Michael Veith<sup>10</sup>, Miguel Vences<sup>17</sup>,  
Norman Wagner<sup>10</sup>, Stefano Canessa<sup>1</sup>, An Martel<sup>1</sup>, Frank Pasmans<sup>1</sup>

1 - Wildlife Health Ghent, Department of Pathology, Bacteriology and Avian Diseases, Faculty of Veterinary  
Medicine, Ghent University, Salisburylaan 133, Merelbeke, Belgium

2 - Department of Ecology and Diseases of Game, Fish and Bees, University of Veterinary and Pharmaceutical  
Sciences Brno, Palackého tř. 1946/1, 612 42 Brno, Czech Republic

3 - Museo Nacional de Ciencias Naturales-CSIC, 28006 Madrid, Spain

4 - Institute of Zoology, Zoological Society of London, Regent's Park, London NW1 4RY, UK

5 - MRC Centre for Global Infectious Disease Analysis, School of Public Health, Imperial College London, UK

6 - Reptile, Amphibian & Fish Conservation Netherlands, PO Box 1413, 6501 BK Nijmegen, the Netherlands

7 - Department of Infectious Diseases and Immunology, Faculty of Veterinary Medicine, Utrecht University, the  
Netherlands

8 - DISTAV - Università di Genova, Italy

9 - Natagora, Département Etudes, 1 Traverse des Muses, B-5000 Namur, Belgium

10 - Department of Biogeography, Trier University, Universitätsring 15, 54296 Trier, Germany

11 - EcoLab, Université de Toulouse, UPS, INPT, CNRS, Toulouse, France

12 - Department of Limnology of Stratified Lakes, Institute of Freshwater Ecology and Inland Fisheries,  
Neuglobsow, Germany

13 - PSL, UMR 5175 CEFE, EPHE, Biogeography and vertebrate Ecology, Montpellier, France

14 - Department of Evolutionary Biology and Environmental Studies, University of Zurich, Winterthurerstrasse 190,  
8057 Zurich, Switzerland

15 - Info Fauna Karch, UniMail, Bâtiment G, Bellevaux 51, 2000 Neuchâtel, Switzerland

16 - University of Leipzig, Institute of Biology, Molecular Evolution and Systematics of Animals, Talstrasse 33,  
04103 Leipzig, Germany

17 - Technische Universität Braunschweig, Zoological Institute, Mendelssohnstr. 4, 38106 Braunschweig, Germany

\*Corresponding author; e-mail: Valarie.Thomas@ugent.be

\*\*These authors contributed equally to this work

## **Supplementary material**

**Table S1.** Import restriction legislation to prevent *Bsal* introduction and spread.

| <b>Country</b>     | <b>Restricted imports</b>                                                                                                                                                                                                                                                                                                                         |
|--------------------|---------------------------------------------------------------------------------------------------------------------------------------------------------------------------------------------------------------------------------------------------------------------------------------------------------------------------------------------------|
| Canada             | The Canadian Wildlife Authorities prohibited the importation of all salamanders including dead Specimens, eggs, sperm, tissue culture or embryos, parts and derivatives without a permit                                                                                                                                                          |
| United States      | The Lacey Act prohibits international trade of live or dead specimens and body tissue from 201 salamander species (US Fish and Wildlife Services, 2016; EFSA, 2017a; Klocke, 2017)                                                                                                                                                                |
| Hungary            | Restrictions have been placed on specified species of high risk (EFSA, 2018; Stark, 2018)<br><br>A modification has been made to decree 41/2010 which prohibits keeping, breeding, buying and selling of members of the family Salamandridae and Hynobidae and <i>Karsenia koreana</i> (Plethodontidae) (199/2017.(VII.10) Korm. Rendelet, 2017). |
| Switzerland        | In December 2015, the Swiss Food Safety and Veterinary Office implemented import restrictions prohibiting the importation of all salamander species into Switzerland. After the implementation of EU decision 2018/320, Switzerland adapted its legislation accordingly.                                                                          |
| EU and Switzerland | Temporary animal health protection measures enacted for the trade of all amphibians in the order Urodela                                                                                                                                                                                                                                          |

The European Commission issued decision (EU) (2018/320) which establishes animal health protection measures for the trade of salamanders within the EU and importation of salamanders from non-EU territories. These include rejection of any salamanders with obvious signs of illness (especially skin lesions) or originating from collections where there have been positive *Bsal* diagnoses, testing salamanders to ensure that they were free from *Bsal*, restricting movement of salamanders, implementing hygiene protocols and biosecurity measures. (Commission Implementing Decision (EU) 2018/320)

#### Worldwide

The Convention on International Trade of Endangered Species of wild fauna and flora (CITES) was also explored as vehicle to restrict trade in Asian amphibians but not deemed appropriate

**Table S2.** Estimated cost of screening captive amphibian collections in Europe for *Bsal*.

1. Screening of captive collections

**Scenario 1**

|                                                                                          |                                         |                                               |
|------------------------------------------------------------------------------------------|-----------------------------------------|-----------------------------------------------|
| 298 members in<br>Deutsche Gesellschaft für<br>Herpetologie and Terrarienkunde<br>(DGHT) | × 100 urodeles/keeper ≈ 30 000 urodeles | Pool samples in groups of 5<br>≈ 6000 samples |
|------------------------------------------------------------------------------------------|-----------------------------------------|-----------------------------------------------|

With 298 urodele keepers and a theoretical 100 urodeles/keeper and pooling samples in groups of 5 (Sabino-Pinto et al., 2018a), screening would cost approximately 180 000 Euros

**Scenario 2**

|                                                                                           |                                          |                                                 |
|-------------------------------------------------------------------------------------------|------------------------------------------|-------------------------------------------------|
| 1490 members in<br>Deutsche Gesellschaft für<br>Herpetologie and Terrarienkunde<br>(DGHT) | × 100 urodeles/keeper = 149 000 urodeles | Pool samples in groups of 5<br>≈ 30 000 samples |
|-------------------------------------------------------------------------------------------|------------------------------------------|-------------------------------------------------|

With 5 times the urodele keepers in scenario 1 (1490) and a theoretical 100 urodeles/keeper and pooling samples in groups of 5 (Sabino-Pinto et al., 2018a), screening would cost approximately 900 000 Euros

- AG Urodela
- Salamandervereniging

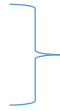

1. Provided information sheets on Bsal on their website
2. Scheduled Bsal lectures during their annual events

- Ornamental Aquatic Trade Association (OATA)
- Reptile and Exotic Pet Association

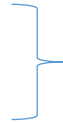

1. Set up information campaigns to improve biosecurity of importers, retailers, customers in combination with several other organisations
2. Published a disease alert to prevent spread from captive to wild amphibians

**Figure S1.** Stakeholders (urodelan keepers and associations) promoting *Bsal* awareness.
